# Supplementary material for: Fabrication of durable underoil superhydrophobic surfaces with self-cleaning and oil–water separation properties
Source: Royal Society of Chemistry journal article supplement (doi:10.1039/d1ra06422c), 2022-01-01
Supplement: d1ra06422c1.pdf [file d1ra06422c1.pdf]

## Supporting Information

### Fabrication of durable underoil superhydrophobic surfaces with self-cleaning and oil–water separation properties

Wanfei Ren, Zhongxu Lian\*, Jiaqi Wang, Jinkai Xu\*, Huadong Yu

*Ministry of Education Key Laboratory for Cross-Scale Micro and Nano*

*Manufacturing, Changchun University of Science and Technology, Changchun,*

*130022, China*

\*Corresponding author.

E-mail address: lianzhongxu@cust.edu.cn (Z.X. Lian); xujinkai2000@163.com.cn (J.K. Xu).

**Movie S1** Water-repellent property of the abraded surface in oil.

**Movie S2** Wettability property of the abraded surface in air.

**Movie S3** Self-cleaning property of underoil superhydrophobic surface in air.

**Movie S4** Self-cleaning property of underoil superhydrophobic surface in oil.

**Movie S5** Oil–water separation process of the mesh (prewetted with chloroform)

before the sandpaper abrasion test.

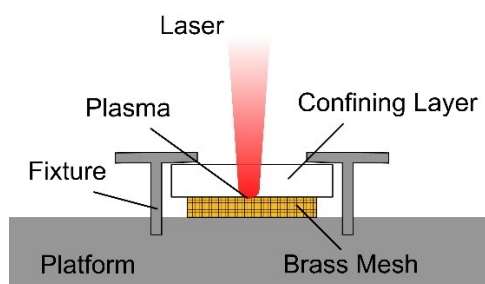

**Figure S1** Schematic diagram of the fabrication of the brass mesh using laser processing technique.

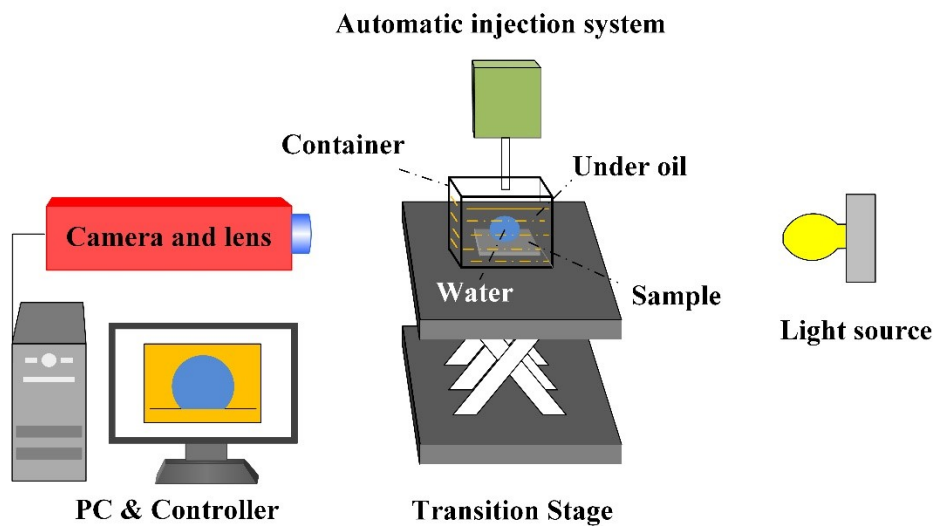

**Figure S2** Schematic diagram of the wettability measurement under oil.

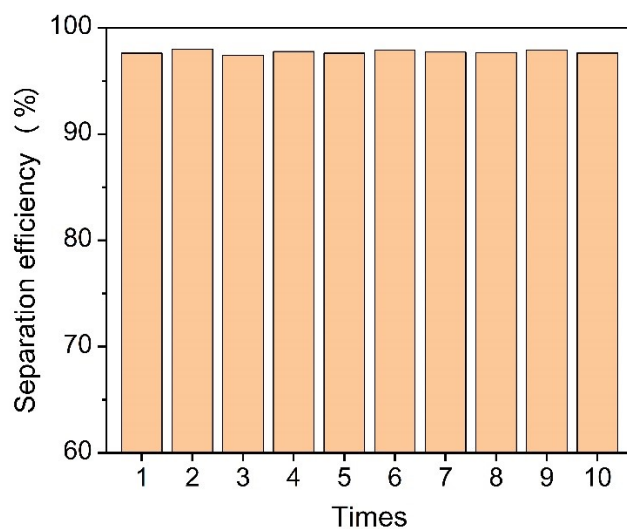

**Figure S3** Separation efficiency of the abraded mesh after repeated separation of 10 times based on the underoil superhydrophobicity.
